# Supplementary material
Source: Springer Nature journal article supplement (https://www.springermedizin.de/resource/supplementary/12889_2010_2560_MOESM6_ESM.pdf/9486444)
Supplement: MOESM6 [file 9486444]

# Indicators of Intervention Success

Exposure/  
process

Mediators

Outcome measures

## Implementation

Exposure to  
intervention  
(frequency,  
length,  
appreciation)

## Social cognitive variables/ Change objectives

E.g. intention,  
monitoring,  
coping planning

## Secondary outcomes/ Performance objectives

Behaviour:  
Energy intake  
Energy  
expenditure

## Primary outcomes/ objective measures

Weight/ BMI  
Waist  
circumference  
Skin fold thickness

*Time of measurement*

1 month post  
intervention

Baseline, 1 month and 6 months post  
intervention

Baseline and 6  
months post-  
intervention
